# Supplementary material for: A transcriptional co-expression network-based approach to identify prognostic biomarkers in gastric carcinoma
Source: PeerJ. 2020 Feb 14;8:e8504. doi: 10.7717/peerj.8504 (PMC7025707; doi:10.7717/peerj.8504)
Supplement: Data S2 [file peerj-08-8504-s003.xls]

## Sheet: Supplementary file 2
Category	Term	Count	%	PValue	Genes	List Total	Pop Hits	Pop Total	Fold Enrichment	Bonferroni	Benjamini	FDR
GOTERM_BP_DIRECT	GO:0030198~extracellular matrix organization	23	7.44337	6.29e-13	ELF3, LUM, TNC, COL3A1, CCDC80, HSPG2, POSTN, DCN, COL5A3, DDR2, EGFLAM, BGN, ITGA5, COL6A3, TGFBI, COL1A2, VCAN, COL1A1, LAMB1, COL8A1, COL11A1, FN1, CYR61	267	196	16792	7.38011	9.68e-10	9.68e-10	1.05e-09
GOTERM_BP_DIRECT	GO:0030199~collagen fibril organization	11	3.55987	3.57e-10	SFRP2, LUM, COL3A1, COL1A2, COL12A1, COL1A1, COL5A3, GREM1, ADAMTS2, COL11A1, DDR2	267	39	16792	17.7386	5.49e-07	2.74e-07	5.94e-07
GOTERM_BP_DIRECT	GO:0001525~angiogenesis	20	6.47249	2.85e-09	EMCN, ACVRL1, CCL2, FLT1, HSPG2, HOXB13, RORA, GJA5, OVOL2, HEY1, UNC5B, ITGA5, CLIC4, TGFBI, ECSCR, ROBO4, SOX17, COL8A1, PLXND1, FN1	267	223	16792	5.64048	4.39e-06	1.46e-06	4.75e-06
GOTERM_BP_DIRECT	GO:0030574~collagen catabolic process	10	3.23625	7.06e-07	MRC2, COL3A1, COL6A3, COL1A2, COL12A1, COL1A1, COL5A3, COL8A1, ADAMTS2, COL11A1	267	64	16792	9.82678	0.00108608	0.000272	0.00117683
GOTERM_BP_DIRECT	GO:0035987~endodermal cell differentiation	7	2.26537	3.34e-06	INHBA, ITGA5, COL12A1, COL8A1, LAMB1, COL11A1, FN1	267	27	16792	16.3052	0.00513126	0.00102836	0.00557116
GOTERM_BP_DIRECT	GO:0007155~cell adhesion	23	7.44337	4.23e-06	CCL2, PODXL, TNC, IGFBP7, POSTN, PCDH17, DDR2, ITGBL1, KIAA1462, ITGA5, COL6A3, TGFBI, FBLN7, COL12A1, VCAN, COL1A1, COL8A1, ADAM12, LAMB1, ENTPD1, NTM, FN1, CYR61	267	459	16792	3.15142	0.00648608	0.00108395	0.00704688
GOTERM_BP_DIRECT	GO:0001501~skeletal system development	12	3.8835	1.17e-05	PTHLH, SH3PXD2B, AEBP1, TRPS1, COL3A1, COL1A2, COL12A1, POSTN, VCAN, COL1A1, GJA5, IGFBP4	267	137	16792	5.50873	0.0177867	0.00256055	0.019434
GOTERM_BP_DIRECT	GO:0045669~positive regulation of osteoblast differentiation	8	2.589	4.36e-05	CTHRC1, SFRP2, GJA1, TMEM119, GLI3, RUNX2, DDR2, CYR61	267	60	16792	8.38552	0.0649431	0.00835835	0.0726928
GOTERM_BP_DIRECT	GO:0022617~extracellular matrix disassembly	8	2.589	0.000199	SH3PXD2B, HTRA1, HSPG2, DCN, TIMP2, ADAMTS5, FN1, TIMP1	267	76	16792	6.62015	0.26403	0.0334893	0.331452
GOTERM_BP_DIRECT	GO:0001649~osteoblast differentiation	9	2.91262	0.000248	TNC, MRC2, GJA1, VCAN, COL1A1, TMEM119, RUNX2, CYR61, IGFBP5	267	104	16792	5.44252	0.316911	0.0373958	0.411903
GOTERM_BP_DIRECT	GO:0042060~wound healing	8	2.589	0.000274	WNT5A, ERBB3, TNC, COL3A1, DCN, GLI3, FN1, TIMP1	267	80	16792	6.28914	0.344403	0.0376553	0.456196
GOTERM_BP_DIRECT	GO:0030335~positive regulation of cell migration	11	3.55987	0.000719	DAB2, FLT1, ITGA5, PODXL, SEMA4C, HAS2, PDGFC, COL1A1, LAMB1, CCL26, CYR61	267	184	16792	3.75981	0.669394	0.0881097	1.19151
GOTERM_BP_DIRECT	GO:0030208~dermatan sulfate biosynthetic process	4	1.2945	0.000778	BGN, CHST14, VCAN, DCN	267	12	16792	20.9638	0.698054	0.0880005	1.28849
GOTERM_BP_DIRECT	GO:0071560~cellular response to transforming growth factor beta stimulus	6	1.94175	0.00103678	WNT5A, ACVRL1, FYN, EPB41L5, POSTN, COL1A1	267	49	16792	7.70099	0.797383	0.10777	1.71404
GOTERM_BP_DIRECT	GO:0030203~glycosaminoglycan metabolic process	5	1.61812	0.00107032	BGN, GPC6, HSPG2, VCAN, DCN	267	29	16792	10.8433	0.807584	0.104052	1.76901
GOTERM_BP_DIRECT	GO:0090090~negative regulation of canonical Wnt signaling pathway	10	3.23625	0.00117755	WNT5A, CTHRC1, DKK3, DAB2, SFRP2, MCC, SOX17, GREM1, GLI3, IGFBP4	267	163	16792	3.85837	0.836887	0.107146	1.94461
GOTERM_BP_DIRECT	GO:0002063~chondrocyte development	4	1.2945	0.00155302	SULF2, SFRP2, RUNX2, COL11A1	267	15	16792	16.771	0.90855	0.131253	2.55716
GOTERM_BP_DIRECT	GO:0007275~multicellular organism development	19	6.14887	0.00170487	WNT5A, TSHZ3, ERG, ELF3, GPR161, MRAS, CREM, DLL1, HIC1, DKK3, CCHCR1, ADAMTS9, DAB2, HOXD8, SHISA2, SFRP2, EBF1, VCAN, EMP1	267	521	16792	2.29354	0.927636	0.135748	2.80387
GOTERM_BP_DIRECT	GO:0042733~embryonic digit morphogenesis	6	1.94175	0.00189853	WNT5A, TBX2, SFRP2, GNA12, GJA1, GLI3	267	56	16792	6.73836	0.946314	0.142665	3.11764
GOTERM_BP_DIRECT	GO:0051216~cartilage development	6	1.94175	0.00239453	WNT5A, ESRRA, SULF2, LUM, PRRX1, TIMP1	267	59	16792	6.39573	0.975018	0.168464	3.91697
GOTERM_BP_DIRECT	GO:0007162~negative regulation of cell adhesion	5	1.61812	0.00269553	ACVRL1, ERBB3, PODXL, TNC, TGFBI	267	37	16792	8.49884	0.984299	0.179475	4.399
GOTERM_BP_DIRECT	GO:0001947~heart looping	6	1.94175	0.0027736	WNT5A, OVOL2, TBX2, GJA1, DLL1, SOX17	267	61	16792	6.18604	0.986081	0.176586	4.52366
GOTERM_BP_DIRECT	GO:0010811~positive regulation of cell-substrate adhesion	5	1.61812	0.00297566	EGFLAM, ITGA5, CCDC80, COL8A1, CYR61	267	38	16792	8.27518	0.98981	0.180784	4.84558
GOTERM_BP_DIRECT	GO:0050900~leukocyte migration	8	2.589	0.00330202	FYN, ITGA5, PODXL, COL1A2, ESAM, COL1A1, CXADR, FN1	267	122	16792	4.12403	0.993843	0.19111	5.36337
GOTERM_BP_DIRECT	GO:0003158~endothelium development	3	0.970874	0.00359558	GJA1, GJA4, GJA5	267	6	16792	31.4457	0.996087	0.198879	5.82688
GOTERM_BP_DIRECT	GO:0051045~negative regulation of membrane protein ectodomain proteolysis	3	0.970874	0.00359558	TIMP2, TIMP3, TIMP1	267	6	16792	31.4457	0.996087	0.198879	5.82688
GOTERM_BP_DIRECT	GO:0019800~peptide cross-linking via chondroitin 4-sulfate glycosaminoglycan	3	0.970874	0.00359558	EGFLAM, BGN, DCN	267	6	16792	31.4457	0.996087	0.198879	5.82688
GOTERM_BP_DIRECT	GO:0008217~regulation of blood pressure	6	1.94175	0.00365911	EDNRA, ACVRL1, PTGS1, COL1A2, GUCY1A3, DLL1	267	65	16792	5.80536	0.996453	0.195061	5.9269
GOTERM_BP_DIRECT	GO:0014068~positive regulation of phosphatidylinositol 3-kinase signaling	6	1.94175	0.00365911	FLT1, UNC5B, FYN, ERBB3, PDGFC, DCN	267	65	16792	5.80536	0.996453	0.195061	5.9269
GOTERM_BP_DIRECT	GO:0030514~negative regulation of BMP signaling pathway	5	1.61812	0.00550979	WNT5A, TWSG1, HTRA1, SFRP2, GREM1	267	45	16792	6.98793	0.999797	0.270158	8.79727
GOTERM_BP_DIRECT	GO:0003151~outflow tract morphogenesis	5	1.61812	0.00596077	TBX2, SFRP2, SOX17, PLXND1, GJA5	267	46	16792	6.83602	0.999899	0.280076	9.48414
GOTERM_BP_DIRECT	GO:0030206~chondroitin sulfate biosynthetic process	4	1.2945	0.00698583	BGN, CSGALNACT2, VCAN, DCN	267	25	16792	10.0626	0.999979	0.310668	11.0273
GOTERM_BP_DIRECT	GO:0060021~palate development	6	1.94175	0.0071146	WNT5A, INHBA, TBX2, BNC2, PRRX1, GLI3	267	76	16792	4.96511	0.999983	0.306694	11.2194
GOTERM_BP_DIRECT	GO:0071356~cellular response to tumor necrosis factor	7	2.26537	0.00811981	CCL2, POSTN, HAS2, RORA, COL1A1, ADAMTS12, CCL26	267	110	16792	4.00218	0.999996	0.33286	12.7057
GOTERM_BP_DIRECT	GO:0031032~actomyosin structure organization	4	1.2945	0.0086802	EPB41L2, FRMD6, CNN3, EPB41L5	267	27	16792	9.31724	0.999999	0.342484	13.5241
GOTERM_BP_DIRECT	GO:0007596~blood coagulation	9	2.91262	0.00913243	FYN, CD59, GNA12, COL1A2, PDGFC, COL1A1, ENTPD1, EHD2, EHD3	267	184	16792	3.07621	0.999999	0.348097	14.1792
GOTERM_BP_DIRECT	GO:0007165~signal transduction	30	9.70874	0.0101612	GPR85, CCL2, ACVRL1, ERBB3, CREM, FST, GJA1, RASSF8, NR3C1, GREM1, SHE, DDR2, CCL26, EDNRA, UNC5B, CC2D1A, RASA3, ERG, PTPRM, PDPN, MRC2, OR51E1, CDS1, ARRDC3, SH3BP5, ARHGAP31, MCC, ANTXR1, IGFBP4, IGFBP5	267	1161	16792	1.6251	1	0.370165	15.6523
GOTERM_BP_DIRECT	GO:0040037~negative regulation of fibroblast growth factor receptor signaling pathway	3	0.970874	0.0103446	WNT5A, SULF2, SHISA2	267	10	16792	18.8674	1	0.36697	15.9124
GOTERM_BP_DIRECT	GO:0045746~negative regulation of Notch signaling pathway	4	1.2945	0.010595	HEY1, OVOL2, BEND6, BCL6	267	29	16792	8.67467	1	0.365777	16.2663
GOTERM_BP_DIRECT	GO:0033690~positive regulation of osteoblast proliferation	3	0.970874	0.0125123	CTHRC1, TMEM119, CYR61	267	11	16792	17.1522	1	0.40769	18.93
GOTERM_BP_DIRECT	GO:0030308~negative regulation of cell growth	7	2.26537	0.0126338	INHBA, ACVRL1, SFRP2, GJA1, BCL6, SOX17, GREM1	267	121	16792	3.63834	1	0.402456	19.0961
GOTERM_BP_DIRECT	GO:0045944~positive regulation of transcription from RNA polymerase II promoter	26	8.41424	0.0129665	WNT5A, GLIS3, ACVRL1, ELF3, LUM, GLIS2, CREM, PRRX1, ZEB2, NR3C1, RORA, DCN, GREM1, GLI3, HEY1, OVOL2, SOX17, TCF4, CYR61, ESRRA, DLL1, INHBA, HOXD8, SFRP2, TRPS1, EBF1	267	981	16792	1.66685	1	0.402514	19.5493
GOTERM_BP_DIRECT	GO:0045892~negative regulation of transcription, DNA-templated	16	5.17799	0.013536	WNT5A, TSHZ3, ELF3, TBX2, GLIS2, CREM, SOX7, GREM1, GLI3, DKK3, DAB2, OVOL2, HEY1, SFRP2, BCL6, RUNX2	267	499	16792	2.01656	1	0.408063	20.3195
GOTERM_BP_DIRECT	GO:0009612~response to mechanical stimulus	5	1.61812	0.014177	CCL2, TNC, COL3A1, POSTN, DCN	267	59	16792	5.32978	1	0.414896	21.1781
GOTERM_BP_DIRECT	GO:0007179~transforming growth factor beta receptor signaling pathway	6	1.94175	0.0154651	ACVRL1, CCL2, LTBP2, CGN, COL3A1, COL1A2	267	92	16792	4.10161	1	0.435103	22.8771
GOTERM_BP_DIRECT	GO:0043588~skin development	4	1.2945	0.0163766	COL3A1, COL5A3, ARRDC3, ADAMTS2	267	34	16792	7.39899	1	0.446217	24.0585
GOTERM_BP_DIRECT	GO:0016525~negative regulation of angiogenesis	5	1.61812	0.0167525	CCL2, PTPRM, ECSCR, DCN, TCF4	267	62	16792	5.07189	1	0.446182	24.5408
GOTERM_BP_DIRECT	GO:0009611~response to wounding	5	1.61812	0.0176717	CCL2, SULF2, TNC, HOXB13, FN1	267	63	16792	4.99138	1	0.456527	25.708
GOTERM_BP_DIRECT	GO:0016477~cell migration	8	2.589	0.0198703	CTHRC1, ERG, CCDC88A, FLT1, FYN, GPC6, PODXL, ADAMTS12	267	172	16792	2.92518	1	0.48905	28.4312
GOTERM_BP_DIRECT	GO:0030207~chondroitin sulfate catabolic process	3	0.970874	0.0200661	BGN, VCAN, DCN	267	14	16792	13.4767	1	0.485079	28.6692
GOTERM_BP_DIRECT	GO:0000122~negative regulation of transcription from RNA polymerase II promoter	20	6.47249	0.0208952	GLIS3, TSHZ3, ESRRA, AEBP1, BEND6, TBX2, GLIS2, FST, PRRX1, WWC2, ZEB2, GLI3, HIC1, HOXD8, HEY1, TRPS1, BCL6, CC2D1A, SOX17, TCF4	267	720	16792	1.74698	1	0.491887	29.6685
GOTERM_BP_DIRECT	GO:0001568~blood vessel development	4	1.2945	0.0220476	COL1A2, COL1A1, ANTXR1, GJA4	267	38	16792	6.62015	1	0.503525	31.0355
GOTERM_BP_DIRECT	GO:0035050~embryonic heart tube development	3	0.970874	0.0229143	TBX2, SOX17, GJA5	267	15	16792	12.5783	1	0.510078	32.0471
GOTERM_BP_DIRECT	GO:0042692~muscle cell differentiation	3	0.970874	0.0229143	SEMA4C, QKI, RORA	267	15	16792	12.5783	1	0.510078	32.0471
GOTERM_BP_DIRECT	GO:0008360~regulation of cell shape	7	2.26537	0.0241374	RHOJ, CCL2, PDPN, FYN, GNA12, FGD5, FN1	267	140	16792	3.14457	1	0.521604	33.451
GOTERM_BP_DIRECT	GO:0003203~endocardial cushion morphogenesis	3	0.970874	0.0259179	ACVRL1, HEY1, TBX2	267	16	16792	11.7921	1	0.540302	35.446
GOTERM_BP_DIRECT	GO:0071347~cellular response to interleukin-1	5	1.61812	0.0261561	CCL2, HAS2, RORA, ADAMTS12, CCL26	267	71	16792	4.42897	1	0.536813	35.7087
GOTERM_BP_DIRECT	GO:0007507~heart development	8	2.589	0.0267665	EDNRA, SH3PXD2B, ERBB3, TRPS1, COL3A1, GJA1, CXADR, GLI3	267	183	16792	2.74935	1	0.538485	36.377
GOTERM_BP_DIRECT	GO:0060348~bone development	4	1.2945	0.0286568	SH3PXD2B, SULF2, PDGFC, PLS3	267	42	16792	5.98966	1	0.556734	38.4056
GOTERM_BP_DIRECT	GO:0032331~negative regulation of chondrocyte differentiation	3	0.970874	0.0290713	PTHLH, ADAMTS12, GREM1	267	17	16792	11.0985	1	0.555491	38.8422
GOTERM_BP_DIRECT	GO:0003294~atrial ventricular junction remodeling	2	0.647249	0.0314317	GJA1, GJA5	267	2	16792	62.8914	1	0.577802	41.2736
GOTERM_BP_DIRECT	GO:1905049~negative regulation of metallopeptidase activity	2	0.647249	0.0314317	TIMP2, TIMP1	267	2	16792	62.8914	1	0.577802	41.2736
GOTERM_BP_DIRECT	GO:0010652~positive regulation of cell communication by chemical coupling	2	0.647249	0.0314317	GJA1, GJA5	267	2	16792	62.8914	1	0.577802	41.2736
GOTERM_BP_DIRECT	GO:0036120~cellular response to platelet-derived growth factor stimulus	3	0.970874	0.0323691	CCL2, FYN, HAS2	267	18	16792	10.4819	1	0.582347	42.2137
GOTERM_BP_DIRECT	GO:0010596~negative regulation of endothelial cell migration	3	0.970874	0.0323691	ACVRL1, PTPRM, DCN	267	18	16792	10.4819	1	0.582347	42.2137
GOTERM_BP_DIRECT	GO:0045807~positive regulation of endocytosis	3	0.970874	0.0323691	WNT5A, DAB2, DLL1	267	18	16792	10.4819	1	0.582347	42.2137
GOTERM_BP_DIRECT	GO:0030154~cell differentiation	14	4.53074	0.0331582	SH3PXD2B, INHBA, CCHCR1, TWSG1, ERG, FLT1, CLIC4, FYN, CREM, ECSCR, GNA12, ROBO4, DLL1, HIP1	267	462	16792	1.9058	1	0.585046	42.9941
GOTERM_BP_DIRECT	GO:0008284~positive regulation of cell proliferation	14	4.53074	0.0352596	FLT1, TBX2, TNC, DLL1, GREM1, CLEC11A, TIMP1, PTHLH, SFRP2, PDGFC, RAB25, HAS2, RUNX2, FN1	267	466	16792	1.88944	1	0.601775	45.0243
GOTERM_BP_DIRECT	GO:0045893~positive regulation of transcription, DNA-templated	15	4.85437	0.0353851	WNT5A, ACVRL1, ELF3, GLIS2, CREB5, AFAP1L2, SOX7, RORA, GLI3, INHBA, DAB2, SOX17, COL1A1, TCF4, RUNX2	267	515	16792	1.83179	1	0.597044	45.1435
GOTERM_BP_DIRECT	GO:0045879~negative regulation of smoothened signaling pathway	3	0.970874	0.0358059	GLIS2, GLI3, RUNX2	267	19	16792	9.93022	1	0.595497	45.5409
GOTERM_BP_DIRECT	GO:0060716~labyrinthine layer blood vessel development	3	0.970874	0.0358059	HEY1, OVOL2, CYR61	267	19	16792	9.93022	1	0.595497	45.5409
GOTERM_BP_DIRECT	GO:0032332~positive regulation of chondrocyte differentiation	3	0.970874	0.0358059	ACVRL1, GLI3, RUNX2	267	19	16792	9.93022	1	0.595497	45.5409
GOTERM_BP_DIRECT	GO:0010975~regulation of neuron projection development	3	0.970874	0.0358059	CCDC88A, SFRP2, DPYSL3	267	19	16792	9.93022	1	0.595497	45.5409
GOTERM_BP_DIRECT	GO:0030168~platelet activation	6	1.94175	0.0361622	PDPN, FYN, COL3A1, GNA12, COL1A2, COL1A1	267	115	16792	3.28129	1	0.593333	45.8754
GOTERM_BP_DIRECT	GO:0001558~regulation of cell growth	5	1.61812	0.038188	HTRA1, IGFBP7, IGFBP4, CYR61, IGFBP5	267	80	16792	3.93071	1	0.607923	47.7405
GOTERM_BP_DIRECT	GO:0001503~ossification	5	1.61812	0.038188	TWSG1, TMEM119, RUNX2, COL11A1, DDR2	267	80	16792	3.93071	1	0.607923	47.7405
GOTERM_BP_DIRECT	GO:0071230~cellular response to amino acid stimulus	4	1.2945	0.0382276	COL3A1, COL1A2, PDGFC, COL1A1	267	47	16792	5.35246	1	0.602621	47.7764
GOTERM_BP_DIRECT	GO:0097150~neuronal stem cell population maintenance	3	0.970874	0.0430759	PRRX1, DLL1, HOOK3	267	21	16792	8.98448	1	0.641823	51.9951
GOTERM_BP_DIRECT	GO:0007266~Rho protein signal transduction	4	1.2945	0.0446552	RHOJ, GNA12, COL1A2, BCL6	267	50	16792	5.03131	1	0.649833	53.2986
GOTERM_BP_DIRECT	GO:0006935~chemotaxis	6	1.94175	0.044761	CCL2, ECSCR, CMTM4, CMTM3, CCL26, CYR61	267	122	16792	3.09302	1	0.645277	53.3847
GOTERM_BP_DIRECT	GO:0003383~apical constriction	2	0.647249	0.0467765	FRMD6, EPB41L5	267	3	16792	41.9276	1	0.65648	54.9972
GOTERM_BP_DIRECT	GO:0010643~cell communication by chemical coupling	2	0.647249	0.0467765	GJA1, GJA5	267	3	16792	41.9276	1	0.65648	54.9972
GOTERM_BP_DIRECT	GO:2000035~regulation of stem cell division	2	0.647249	0.0467765	SFRP2, SOX17	267	3	16792	41.9276	1	0.65648	54.9972
GOTERM_BP_DIRECT	GO:0021773~striatal medium spiny neuron differentiation	2	0.647249	0.0467765	INHBA, SHANK3	267	3	16792	41.9276	1	0.65648	54.9972
GOTERM_BP_DIRECT	GO:0044691~tooth eruption	2	0.647249	0.0467765	COL1A1, ADAMTS5	267	3	16792	41.9276	1	0.65648	54.9972
GOTERM_BP_DIRECT	GO:0061005~cell differentiation involved in kidney development	2	0.647249	0.0467765	GLIS2, GLI3	267	3	16792	41.9276	1	0.65648	54.9972
GOTERM_BP_DIRECT	GO:0098904~regulation of AV node cell action potential	2	0.647249	0.0467765	CXADR, GJA5	267	3	16792	41.9276	1	0.65648	54.9972
GOTERM_BP_DIRECT	GO:0090500~endocardial cushion to mesenchymal transition	2	0.647249	0.0467765	ACVRL1, HAS2	267	3	16792	41.9276	1	0.65648	54.9972
GOTERM_BP_DIRECT	GO:0010719~negative regulation of epithelial to mesenchymal transition	3	0.970874	0.0468992	VASN, OVOL2, SFRP2	267	22	16792	8.5761	1	0.652181	55.0936
GOTERM_BP_DIRECT	GO:0010906~regulation of glucose metabolic process	3	0.970874	0.0468992	RORA, IGFBP4, IGFBP5	267	22	16792	8.5761	1	0.652181	55.0936
GOTERM_BP_DIRECT	GO:0030178~negative regulation of Wnt signaling pathway	4	1.2945	0.0492192	DKK3, SHISA2, SFRP2, HIC1	267	52	16792	4.8378	1	0.665135	56.8811
GOTERM_BP_DIRECT	GO:0048146~positive regulation of fibroblast proliferation	4	1.2945	0.0540017	WNT5A, PDGFC, DDR2, FN1	267	54	16792	4.65862	1	0.69475	60.3571
GOTERM_BP_DIRECT	GO:0032456~endocytic recycling	3	0.970874	0.0548979	RAB17, EHD2, EHD3	267	24	16792	7.86142	1	0.695885	60.9784
GOTERM_BP_DIRECT	GO:0030866~cortical actin cytoskeleton organization	3	0.970874	0.0548979	EPB41L2, EHD2, LLGL2	267	24	16792	7.86142	1	0.695885	60.9784
GOTERM_BP_DIRECT	GO:0009954~proximal/distal pattern formation	3	0.970874	0.0548979	DLL1, GREM1, GLI3	267	24	16792	7.86142	1	0.695885	60.9784
GOTERM_BP_DIRECT	GO:0030036~actin cytoskeleton organization	6	1.94175	0.0559653	RHOJ, CORO2A, MRAS, BCL6, SPIRE2, FGD5	267	130	16792	2.90268	1	0.698132	61.7065
GOTERM_BP_DIRECT	GO:0042662~negative regulation of mesodermal cell fate specification	2	0.647249	0.0618791	SFRP2, SOX17	267	4	16792	31.4457	1	0.730381	65.5143
GOTERM_BP_DIRECT	GO:1900746~regulation of vascular endothelial growth factor signaling pathway	2	0.647249	0.0618791	DLL1, TCF4	267	4	16792	31.4457	1	0.730381	65.5143
GOTERM_BP_DIRECT	GO:0060214~endocardium formation	2	0.647249	0.0618791	OVOL2, SOX17	267	4	16792	31.4457	1	0.730381	65.5143
GOTERM_BP_DIRECT	GO:0007442~hindgut morphogenesis	2	0.647249	0.0618791	WNT5A, GLI3	267	4	16792	31.4457	1	0.730381	65.5143
GOTERM_BP_DIRECT	GO:0061098~positive regulation of protein tyrosine kinase activity	3	0.970874	0.0633357	ERBB3, AFAP1L2, GREM1	267	26	16792	7.2567	1	0.734188	66.396
GOTERM_BP_DIRECT	GO:0030336~negative regulation of cell migration	5	1.61812	0.0642125	ACVRL1, SFRP2, CLIC4, DPYSL3, IGFBP5	267	95	16792	3.31007	1	0.734589	66.9164
GOTERM_BP_DIRECT	GO:0042476~odontogenesis	3	0.970874	0.0677082	INHBA, COL1A2, LAMB1	267	27	16792	6.98793	1	0.749253	68.917
GOTERM_BP_DIRECT	GO:0001569~patterning of blood vessels	3	0.970874	0.0721773	EDNRA, SFRP2, PLXND1	267	28	16792	6.73836	1	0.767627	71.3093
GOTERM_BP_DIRECT	GO:0007229~integrin-mediated signaling pathway	5	1.61812	0.072393	DAB2, ITGA5, COL3A1, ADAM12, ITGBL1	267	99	16792	3.17633	1	0.764405	71.4203
GOTERM_BP_DIRECT	GO:0007416~synapse assembly	4	1.2945	0.0723954	WNT5A, SDK1, PLXND1, SHANK3	267	61	16792	4.12403	1	0.760175	71.4215
GOTERM_BP_DIRECT	GO:0032092~positive regulation of protein binding	4	1.2945	0.0723954	WNT5A, CTHRC1, EPB41L5, PLXND1	267	61	16792	4.12403	1	0.760175	71.4215
GOTERM_BP_DIRECT	GO:0042127~regulation of cell proliferation	7	2.26537	0.0746433	ESRRA, CCDC88A, FYN, ERBB3, TNC, PTGS1, BCL6	267	185	16792	2.37967	1	0.766826	72.5541
GOTERM_BP_DIRECT	GO:0045909~positive regulation of vasodilation	3	0.970874	0.0767389	PTPRM, GJA1, GJA5	267	29	16792	6.50601	1	0.772469	73.5719
GOTERM_BP_DIRECT	GO:0001937~negative regulation of endothelial cell proliferation	3	0.970874	0.0767389	ACVRL1, PTPRM, GJA1	267	29	16792	6.50601	1	0.772469	73.5719
GOTERM_BP_DIRECT	GO:0045636~positive regulation of melanocyte differentiation	2	0.647249	0.0767433	ADAMTS9, ZEB2	267	5	16792	25.1566	1	0.768443	73.574
GOTERM_BP_DIRECT	GO:0016055~Wnt signaling pathway	7	2.26537	0.0773714	WNT5A, DKK3, DAB2, SFRP2, RSPO3, MCC, HIC1	267	187	16792	2.35422	1	0.767308	73.872
GOTERM_BP_DIRECT	GO:0030512~negative regulation of transforming growth factor beta receptor signaling pathway	4	1.2945	0.0810276	ASPN, VASN, HTRA1, CD109	267	64	16792	3.93071	1	0.779563	75.5452
GOTERM_BP_DIRECT	GO:0044344~cellular response to fibroblast growth factor stimulus	3	0.970874	0.0813891	CCL2, POSTN, COL1A1	267	30	16792	6.28914	1	0.777254	75.705
GOTERM_BP_DIRECT	GO:0048706~embryonic skeletal system development	3	0.970874	0.0813891	WNT5A, SULF2, COL1A1	267	30	16792	6.28914	1	0.777254	75.705
GOTERM_BP_DIRECT	GO:0071773~cellular response to BMP stimulus	3	0.970874	0.0813891	ACVRL1, ADAMTS12, RUNX2	267	30	16792	6.28914	1	0.777254	75.705
GOTERM_BP_DIRECT	GO:0030513~positive regulation of BMP signaling pathway	3	0.970874	0.0861238	TWSG1, ACVRL1, CYR61	267	31	16792	6.08626	1	0.792999	77.7099
GOTERM_BP_DIRECT	GO:0001974~blood vessel remodeling	3	0.970874	0.0909393	ACVRL1, BGN, RSPO3	267	32	16792	5.89607	1	0.807699	79.5888
GOTERM_BP_DIRECT	GO:0007044~cell-substrate junction assembly	2	0.647249	0.0913729	ITGA5, FN1	267	6	16792	20.9638	1	0.805735	79.7504
GOTERM_BP_DIRECT	GO:0003416~endochondral bone growth	2	0.647249	0.0913729	BNC2, DDR2	267	6	16792	20.9638	1	0.805735	79.7504
GOTERM_BP_DIRECT	GO:0060028~convergent extension involved in axis elongation	2	0.647249	0.0913729	WNT5A, SFRP2	267	6	16792	20.9638	1	0.805735	79.7504
GOTERM_BP_DIRECT	GO:1903672~positive regulation of sprouting angiogenesis	2	0.647249	0.0913729	ITGA5, DLL1	267	6	16792	20.9638	1	0.805735	79.7504
GOTERM_BP_DIRECT	GO:2000052~positive regulation of non-canonical Wnt signaling pathway	2	0.647249	0.0913729	WNT5A, RSPO3	267	6	16792	20.9638	1	0.805735	79.7504
GOTERM_BP_DIRECT	GO:0034454~microtubule anchoring at centrosome	2	0.647249	0.0913729	NIN, HOOK3	267	6	16792	20.9638	1	0.805735	79.7504
GOTERM_BP_DIRECT	GO:0061299~retina vasculature morphogenesis in camera-type eye	2	0.647249	0.0913729	RHOJ, CLIC4	267	6	16792	20.9638	1	0.805735	79.7504
GOTERM_BP_DIRECT	GO:0060056~mammary gland involution	2	0.647249	0.0913729	ELF3, IGFBP5	267	6	16792	20.9638	1	0.805735	79.7504
GOTERM_BP_DIRECT	GO:0010718~positive regulation of epithelial to mesenchymal transition	3	0.970874	0.0958319	DAB2, EPB41L5, COL1A1	267	33	16792	5.7174	1	0.817995	81.3445
GOTERM_BP_DIRECT	GO:0001938~positive regulation of endothelial cell proliferation	4	1.2945	0.0963422	WNT5A, ACVRL1, CCL2, CCL26	267	69	16792	3.64588	1	0.816336	81.5192
GOTERM_BP_DIRECT	GO:0071300~cellular response to retinoic acid	4	1.2945	0.0995373	WNT5A, CCL2, TNC, COL1A1	267	70	16792	3.59379	1	0.823607	82.5786
