# Supplementary material for: A transcriptional co-expression network-based approach to identify prognostic biomarkers in gastric carcinoma
Source: PeerJ. 2020 Feb 14;8:e8504. doi: 10.7717/peerj.8504 (PMC7025707; doi:10.7717/peerj.8504)
Supplement: Data S3 [file peerj-08-8504-s004.xls]

## Sheet: ClueGO Results
GOID	GOTerm	Ontology Source	Term PValue	Term PValue Corrected with Bonferroni step down	Group PValue	Group PValue Corrected with Bonferroni step down	GOLevels	GOGroups	% Associated Genes	Nr. Genes	Associated Genes Found
GO:0004611	Platelet activation	KEGG_01.03.2017	0.00043	0.0051	0.00043	0.00086	[-1]	Group0	6.50407	8	[ADCY4, COL1A1, COL1A2, COL3A1, FYN, GUCY1A3, GUCY1B3, PTGS1]
GO:0004974	Protein digestion and absorption	KEGG_01.03.2017	0.00033	0.0044	0.00033	0.001	[-1]	Group1	7.77778	7	[COL11A1, COL12A1, COL1A1, COL1A2, COL3A1, COL5A3, COL6A3]
GO:0005205	Proteoglycans in cancer	KEGG_01.03.2017	0.0029	0.029	0.0029	0.0029	[-1]	Group2	4.4335	9	[DCN, ERBB3, FN1, HSPG2, ITGA5, LUM, MRAS, TIMP3, WNT5A]
GO:0004510	Focal adhesion	KEGG_01.03.2017	0.00066	0.0072	0.00031	0.0012	[-1]	Group3	5.02513	10	[COL1A1, COL1A2, COL6A3, FLT1, FN1, FYN, ITGA5, LAMB1, PDGFC, TNC]
GO:0004512	ECM-receptor interaction	KEGG_01.03.2017	2.4e-05	0.00034	0.00031	0.0012	[-1]	Group3	9.7561	8	[COL1A1, COL1A2, COL6A3, FN1, HSPG2, ITGA5, LAMB1, TNC]
