# Supplementary material for: A transcriptional co-expression network-based approach to identify prognostic biomarkers in gastric carcinoma
Source: PeerJ journal article supplement (doi:10.7717/peerj.8504), 2020-02-14

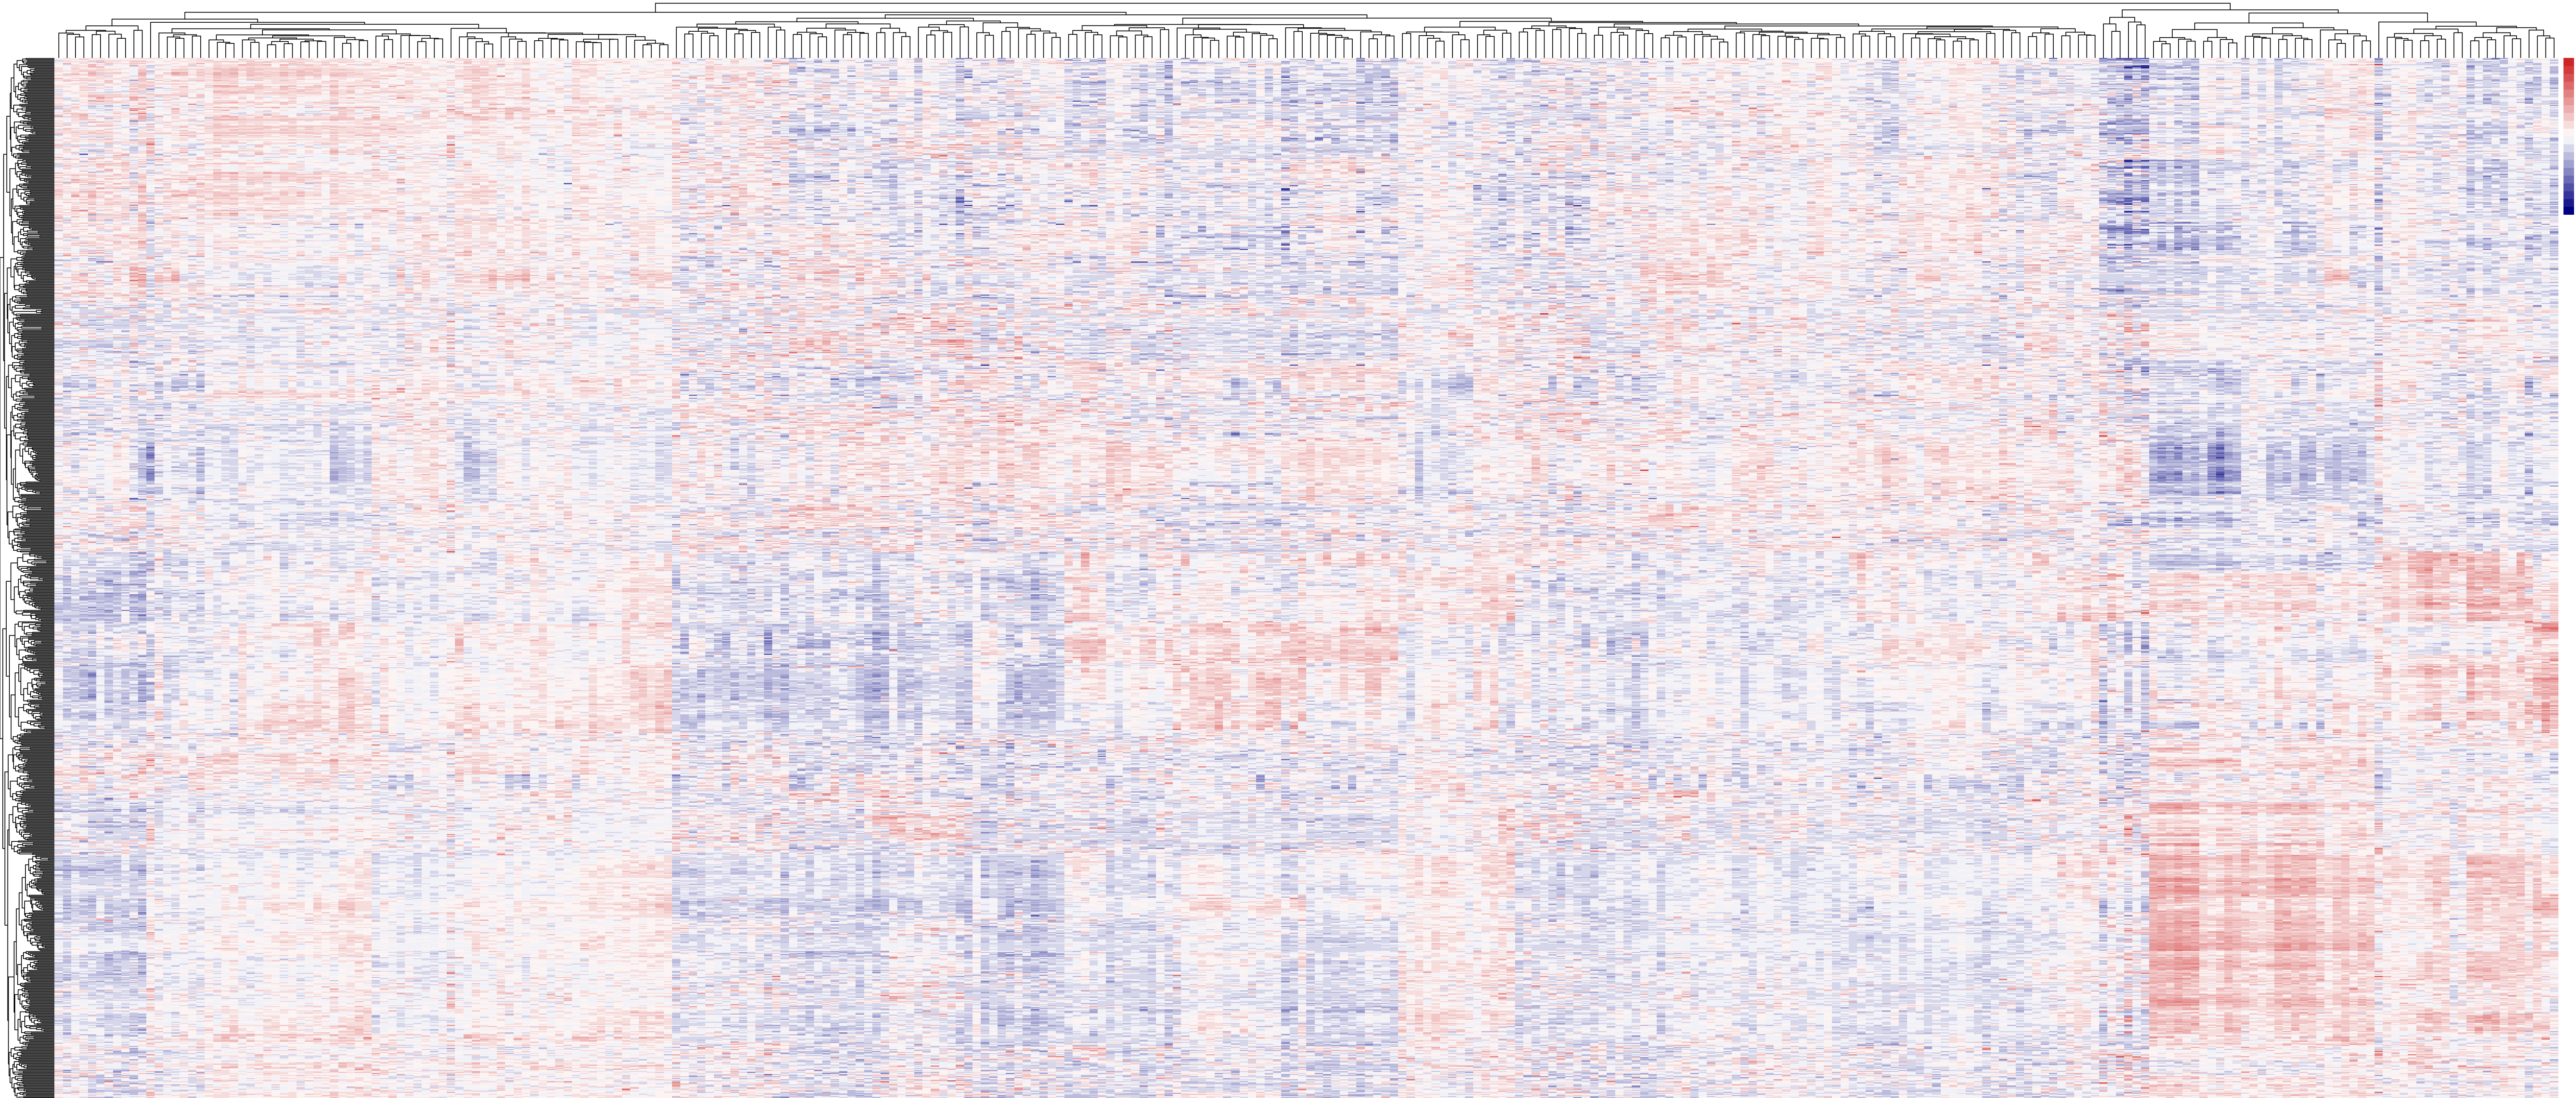

Supplement: Supplemental_Figure_S1.pdf [file Supplemental_Figure_S1.pdf]
